CORRECTION

# Correction: Computational phenotypes for patients with opioid-related disorders presenting to the emergency department

R. Andrew Taylor, Aidan Gilson, Wade Schulz, Kevin Lopez, Patrick Young, Sameer Pandya, Andreas Coppi, David Chartash, David Fiellin, Gail D'Onofrio

In the Study design and setting subsection of Materials and methods, there is an error in the sixth sentence. The correct sentence is: The Yale institutional review board approved this study and waived the need for informed consent (HIC# 2000025279).

## Reference

1. Taylor RA, Gilson A, Schulz W, Lopez K, Young P, Pandya S, et al. Computational phenotypes for patients with opioid-related disorders presenting to the emergency department. PLoS One. 2023;18(9):e0291572. <https://doi.org/10.1371/journal.pone.0291572> PMID: [37713393](https://pubmed.ncbi.nlm.nih.gov/37713393/)

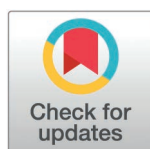

## OPEN ACCESS

**Citation:** Taylor RA, Gilson A, Schulz W, Lopez K, Young P, Pandya S, et al. (2025) Correction: Computational phenotypes for patients with opioid-related disorders presenting to the emergency department. PLoS One 20(5): e0324877. <https://doi.org/10.1371/journal.pone.0324877>

**Published:** May 16, 2025

**Copyright:** © 2025 Taylor et al. This is an open access article distributed under the terms of the [Creative Commons Attribution License](https://creativecommons.org/licenses/by/4.0/), which permits unrestricted use, distribution, and reproduction in any medium, provided the original author and source are credited.
